# Supplementary material for: Organically templated uranium(iv) fluorooxalates with layer structures: (H4TREN)[U2F6(C2O4)3]·4H2O (TREN = tris(2-aminoethyl)amine) and (H4APPIP)[U2F6(C2O4)3]·4H2O (APPIP = 1,4-bis(3-amino-propyl)piperazine)
Source: Royal Society of Chemistry journal article supplement (doi:10.1039/b617333k), 2007-01-01
Supplement: b617333k.pdf [file b617333k.pdf]

## Supporting Information

### Organically Templated Uranium(IV) Fluorooxalates with Layer Structures:

$(\text{H}_4\text{TREN})[\text{U}_2\text{F}_6(\text{C}_2\text{O}_4)_3]\cdot 4\text{H}_2\text{O}$  (TREN = tris(2-aminoethyl)amine) and

$(\text{H}_4\text{APPIP})[\text{U}_2\text{F}_6(\text{C}_2\text{O}_4)_3]\cdot 4\text{H}_2\text{O}$  (APPIP =

1,4-bis(3-amino-propyl)piperazine)

Chih-Min Wang,<sup>a,b</sup> Yi-Ying Wu,<sup>a</sup> Pei-Lin Chen,<sup>a</sup> and Kwang-Hwa Lii<sup>a,b,\*</sup>

<sup>a</sup>Department of Chemistry, National Central University, Chungli, Taiwan 320, R.O.C.

<sup>b</sup>Institute of Chemistry, Academia Sinica, Nankang, Taipei, Taiwan 115, R.O.C.

**Figure S1.** Experimental (top) and simulated (bottom) X-ray powder patterns for

$(\text{H}_4\text{TREN})[\text{U}_2\text{F}_6(\text{C}_2\text{O}_4)_3]\cdot 4\text{H}_2\text{O}$

**Figure S2.** The infrared spectrum of  $(\text{H}_4\text{TREN})[\text{U}_2\text{F}_6(\text{C}_2\text{O}_4)_3]\cdot 4\text{H}_2\text{O}$  (KBr method).

**Figure S3.** Thermogravimetric analysis of  $(\text{H}_4\text{TREN})[\text{U}_2\text{F}_6(\text{C}_2\text{O}_4)_3]\cdot 4\text{H}_2\text{O}$  in flowing air at 5

$^{\circ}\text{C min}^{-1}$ .

**Figure S4.** Experimental (top) and simulated (bottom) X-ray powder patterns for

$(\text{H}_4\text{APPIP})[\text{U}_2\text{F}_6(\text{C}_2\text{O}_4)_3]\cdot 4\text{H}_2\text{O}$ .

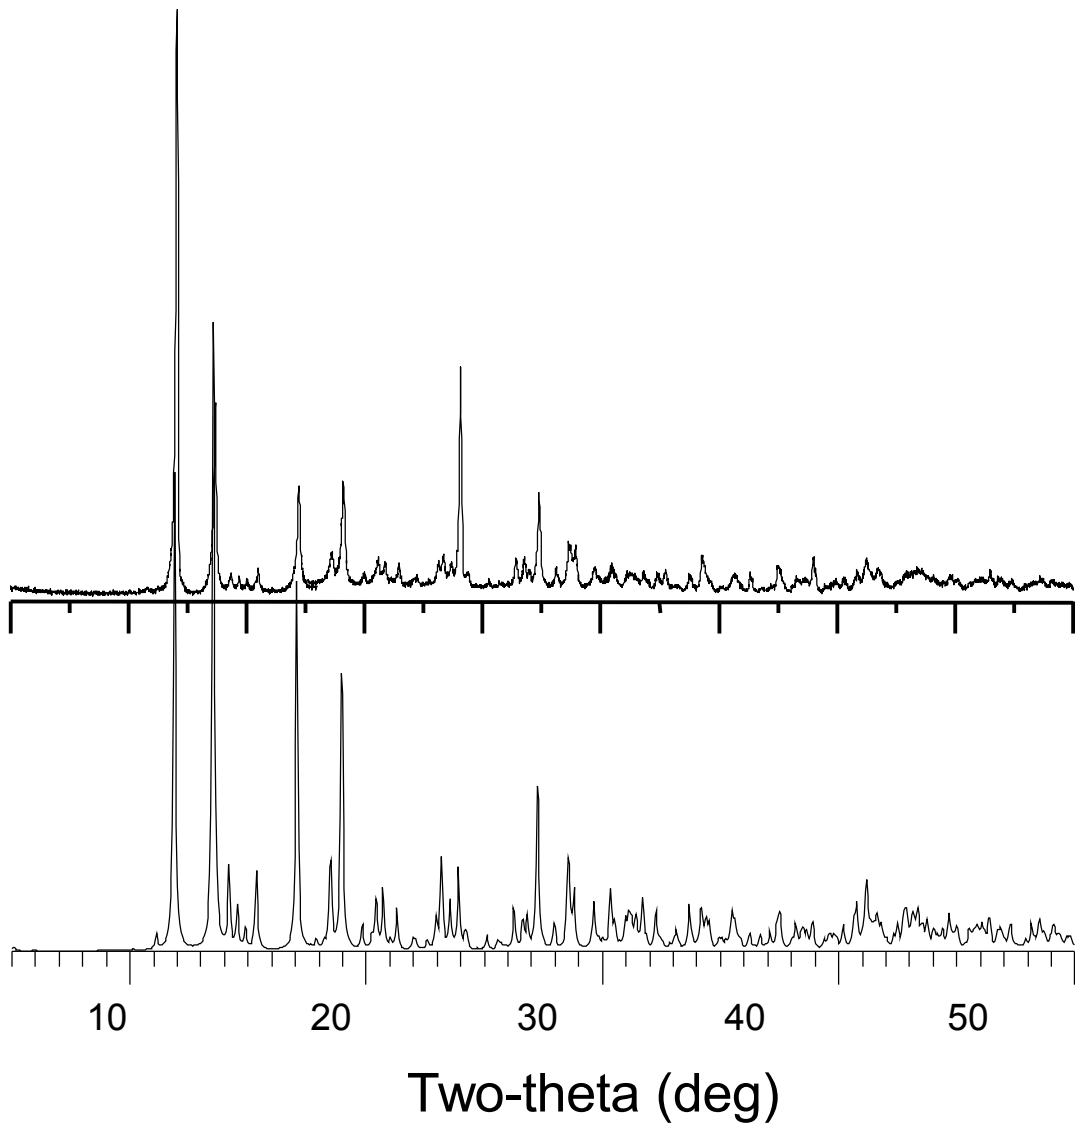

Figure S1

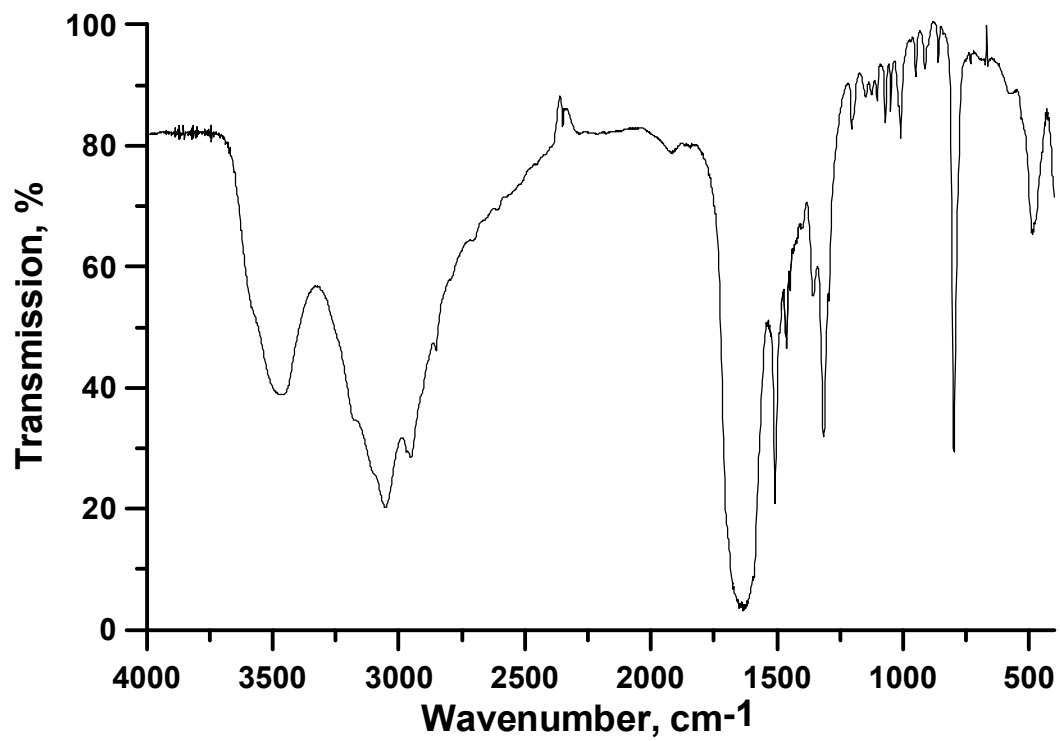

Figure S2

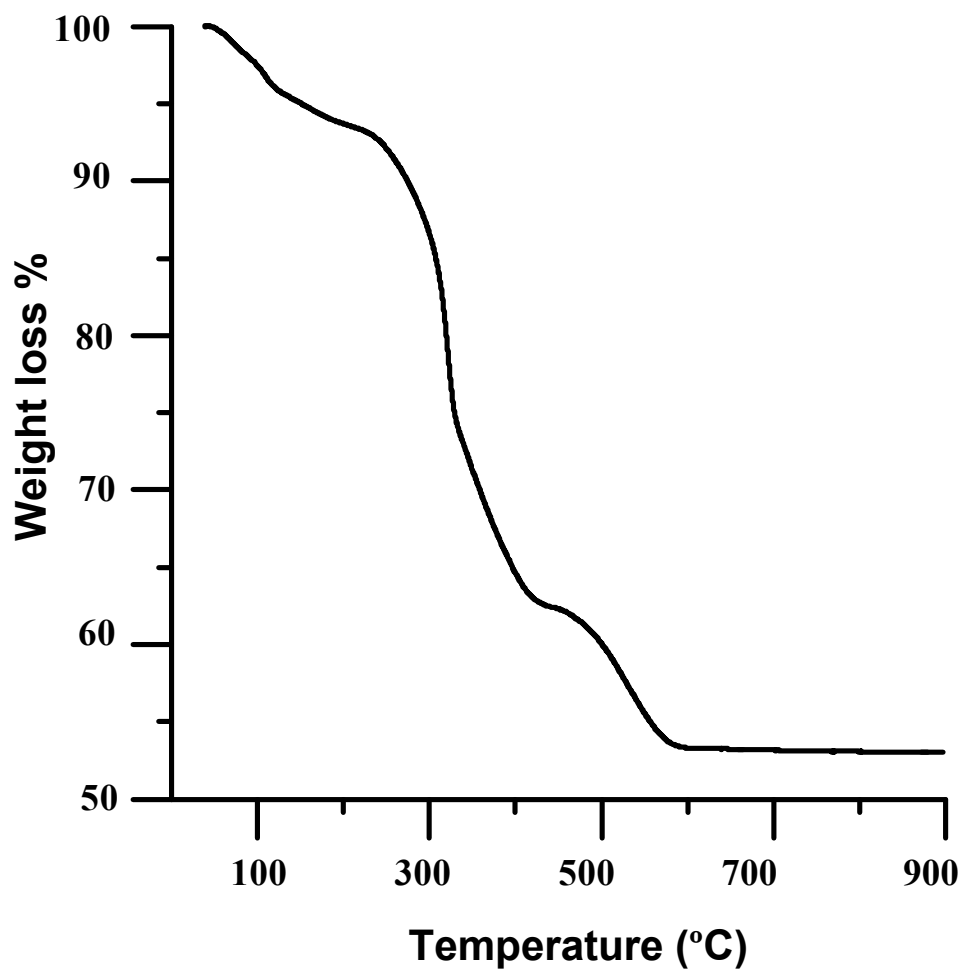

Figure S3

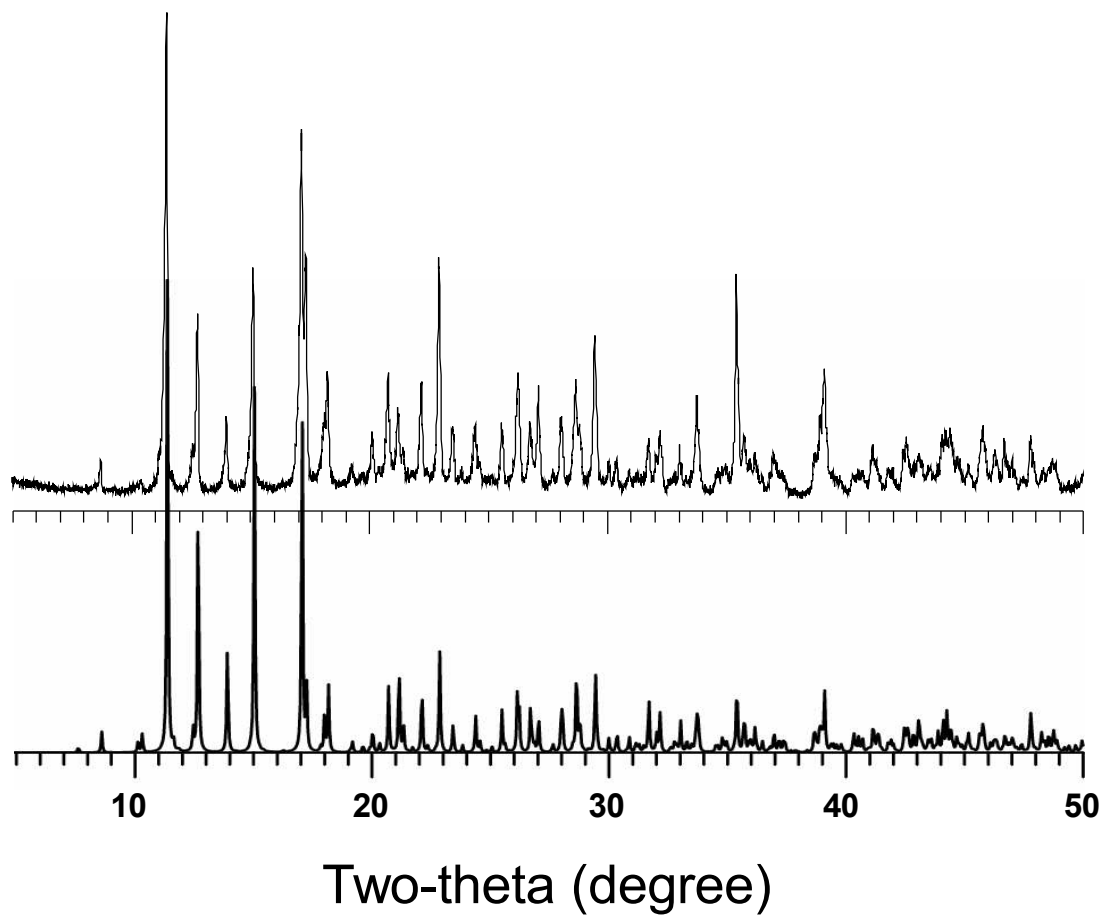

Figure S4
